# Supplementary material for: Teaching children road safety through storybooks: an approach to child health literacy in Pakistan
Source: Springer Nature journal article supplement (doi:10.1186/s12887-018-0982-5), 2018-02-07
Supplement: MOESM2 [file 15445870]

## Annexure 2: Data Collection Tool (Questionnaire)

### The Child Understanding of Traffic Education (CUTE) Questionnaire

بچوں میں ٹریفک کے متعلق آگاہی کے بارے میں سوالنامہ

|                                   |                                     |                                     |                       |
|-----------------------------------|-------------------------------------|-------------------------------------|-----------------------|
| Name: _____                       | Class: _____                        | Age: _____                          | ID: _____             |
| School: _____                     | Gender: Boy / Girl                  |                                     |                       |
| Date CUTE Administered: _____     |                                     |                                     |                       |
| Pre-Test <input type="checkbox"/> | Post-Test1 <input type="checkbox"/> | Post-Test2 <input type="checkbox"/> | Score Obtained: _____ |

Instructions: Choose ONE answer for each question.

چاہت: ہر سوال کیلئے ایک جواب کا انتخاب کریں۔

1. If your football rolls across the road, how should you get your football back?

(1) اگر آپ کی فٹ بال سڑک پر چل جائے تو آپ سے واپس کیسے لائیں گے؟

A.  Quickly run across the road to get your football back

(A)  بھاگ کر سڑک پر جائیں گے اور فٹ بال واپس لے آئیں گے

B.  Slowly walk across the road to get your football back

(B)  آہستہ سے پیدل چل کر سڑک پر جائیں گے اور فٹ بال واپس لے آئیں گے

C.  Stop and look both ways for traffic, then cross the road to get your football back

(C)  راک کر سڑک کے دونوں طرف ٹریفک دیکھیں گے اور فٹ بال واپس لے آئیں گے

2. When walking on the road, how should you walk?

(2) آپ سڑک پر چل رہے ہوں تو آپ کو کیسے چلنا چاہیے؟

A.  In the middle of the road

(A)  سڑک کے چچ میں

B.  On the footpath

(B)  فٹ پاتھ پر

C.  Run on the road

(C)  سڑک پر دوڑ کر

3. What care should one take when riding a motorcycle?

(3) موٹر سائیکل چلاتے وقت کیا احتیاط کرنی چاہیے؟

A.  Wear a helmet

(A)  ہیلمٹ پہننا چاہیے

B.  Wear a seatbelt

(B)  سیٹ بیلٹ پہننی چاہیے

C.  Wear sunglasses

(C)  دھوپ کا چشمہ لگانا چاہیے

4. Inside a moving car, what is a dangerous thing to do?

(4) چلتی ہوئی گاڑی میں کیا کتنا خطرناک ہے

A.  Wear a seatbelt

(A)  سیٹ بیلٹ پہننا

B.  Put your arm outside the window

(B)  اپنا بازو کھڑکی سے باہر نکالنا

C.  Sit in the backseat

(C)  پیچھے والی سیٹ پر بیٹھنا

5. Where is it most safe to cross a road?

- A.  Wherever you like  
B.  Where a street / road bends or turns  
C.  At a zebra crossing

5) کس جگہ سے سڑک پار کرنا سب سے زیادہ محفوظ ہے؟

- A.  جہاں سے آپ کا دل کرے  
B.  جہاں سڑک پھوڑو ہو  
C.  زبرراکراسنگ پر

6. How should you ride in a car?

- A.  In the lap of the driver  
B.  In the front seat  
C.  In the back seat

6) گاڑی میں آپ کو کس طرح سڑک پارنا چاہیے؟

- A.  ڈرائیور کی گود میں  
B.  سامنے کی سیٹ پر  
C.  پیچھے والی سیٹ پر

7. In your opinion, how often should a driver stop at a red signal?

- A.  Always stop at a red signal  
B.  Sometimes stop at a red signal  
C.  Never stop at a red signal

7) آپ کے خیال میں ڈرائیور کو لال بجی کے سگنل پر کتنی مرتبہ گاڑی روکنا چاہیے؟

- A.  ہمیشہ روکنا چاہیے  
B.  کبھی کبھی روکنا چاہیے  
C.  کبھی نہیں روکنا چاہیے

8. Do you think it is safe to play on the streets near your home without adult supervision?

- A.  Yes  
B.  No  
C.  I don't know

8) آپ کے خیال میں گھر کے پاس سڑک پر بچہ کسی بزرگ کی موجودگی میں کھیلنا محفوظ ہے؟

- A.  جی ہاں  
B.  جی نہیں  
C.  مجھے معلوم نہیں

9. Do you think you should be taught about traffic safety in school?

- A.  Yes  
B.  No  
C.  I don't know

9) کیا آپ کو لگتا ہے کہ آپ کو اسکول میں ٹریفک سیفٹی کی معلومات پڑھنی چاہیے؟

- A.  جی ہاں  
B.  جی نہیں  
C.  مجھے معلوم نہیں

10. Do you think storybooks with pictures help you remember information?

- A.  Yes  
B.  No  
C.  I don't know

10) کیا آپ کو لگتا ہے کہ تصویروں والی کہانی کی کتابیں آپ کو معلومات یاد رکھنے میں مدد دیتی ہیں؟

- A.  جی ہاں  
B.  جی نہیں  
C.  مجھے معلوم نہیں
